# Supplementary material
Source: Springer Nature journal article supplement (https://www.springermedizin.de/resource/supplementary/12933_2012_473_MOESM2_ESM.pdf/9538606)

**CIMT1**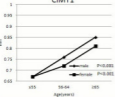**CIMT2**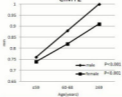**dCIMT**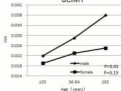

Supplement: MOESM2 [file 9538606]
